# Supplementary material for: A unified 3D geological model for Germany and adjacent areas
Source: Copernicus journal article supplement (doi:10.5194/essd-18-585-2026), 2026-01-22
Supplement: Supplementary file 1 [file Table S1 - Stratigraphic correlation.xlsx]

## Sheet: Stratigraphic correlation
ID	surface name	Netherlands	Netherlands 2	TUNB	Vlaandern	Landesmodell NRW	Hessen	Hessen 2	Thueringer Becken	NW Sachsen	SN Zwischengebiet	Niederlausitz	GeORG	Landesmodell BW	Geothermieatlas BY	Ingolstadt	Niederbayern	GeoMol Swiss	GeoMol LCA BW	GeoMol LCA BY	GeoMol FWM BY	GeoMol UA-UB BY	GeoMol Austria	3DD	FRANKEN Seismic	Literature
		TNO (2019a)	TNO (2019b)	BGR et al. (2022)	Deckers et al. (2019)	Geologischer Dienst NRW (2022)	Bär et al. (2021)	Weinert et al. (2022)	TLUBN (2014)	Görne (2011)	Görne (2012b)	Görne & Geißler (2015)	GeORG-Projektteam (2013)	Rupf & Nitsch (2008)	LfU (2022)	Ringseis et al. (2020b)	Donner (2020b)	Swisstopo (2019)	GeoMol LCA-Projectteam (2015a)	GeoMol LCA-Projectteam (2015b)	GeoMol Team (2015b)	GeoMol UA-UB-Projectteam (2015)	Pfleiderer et al. (2016)	Anikiev et al. (2019)	Fazlikhani et al. (2022)
0001	Topography																									Danielson & Gesch (2011)
0002	Bathymetry
0101	Base Cenozoic volcanic rocks																							03_Cenozoic_Sediments_of_the_North_German_Basin
0102	Base low terrace and flood plain sediments															01 q7 + altm - Würmzeitliche bis holozäne Ablagerungen
0103	Base high lying terrace															02 q6t - rißzeitliche Fluss- und Schmelzwasserschotter
0104	Base medium terrace															03 q5 - günz- bis mindelzetliche Schotterablagerungen
0105	Base sheet gravel															04 q3 - danauzeitliche Fluss- und Schmelzwasserschotter
0106	Basis Quarternary				01Q_b - Basis Quartär	gg_q_b - Basis Quartär				ts_03_xxxx_01_000_Quart – Basis Quartär	ts_10_ZwGe_01_000_Quart - Basis Quartär	ts_06_NL_02_000_Quart - Basis Quartär		01_bq_ges – Basis Quartär		06 q1 - älter-biberzeitliche Fluss- und Schmelzwasserschotter	01 q,, - Basis Quartär		lca_bw_bq - Basis Quartär	01a q,, - Basis Quartär	01a q,, - Basis Quartär	01a q,, - Basis Quartär				Geißler et al. (2014)
0201	Base Pliocene												010_blg_all_uncut_outrop_s01 - Basis Lockergesteine (Pliozän)
0202	Base younger upper freshwater molasse															08 OSM5 - Höhere Obere Süßwassermolasse
0203	Base gravel dominating middle upper freshwater molasse															09 OSM4 - Mittlere Obere Süßwassermolasse (schotterbetonte Fazies)
0204	Base boulder sand dominating middle upper freshwater molasse															10 OSM3 - Mittlere Obere Süßwassermolasse (geröllsandbetonte Fazies)
0205	Base upper freswater molasse															11 OSM2 - Tiefere Obere Süßwassermolasse		TOMM-2019 - Top Obere Meeresmolasse OMM _Upper Marine Molasse_	lca_bw_btOS - Basis Obere Süßwassermolasse	01b OSMa - Basis Ältere Obere Süßwassermolasse	01b OSMa - Basis Obere Süßwassermolasse (unterer Teil)	01b OSMa - Basis Obere Süßwassermolasse (unterer Teil)	base_UpperFreshwaterMolasse_Karpat_
0206	Base younger upper brackish molasse															12 SM - Höhere Obere Brackwassermolasse bis tiefste Obere Süßwassermolasse
0207	Grimmelfinger Schichten															13 OBM1 - Grimmelfinger Schichten (Obere Brackwassermolasse)										SGD (2013b)
0208	Steinhoefe formation																		lca_bw_btSH - Basis Steinhöfe-Formation							Heckeberg et al. (2010)
0209	Baltringen formation																		lca_bw_btBA - Basis Baltringen-Formation							Heckeberg et al. (2010)
0210	Younger upper marine molasse															14 BM - Höhere Obere Meeresmolasse bis tiefere Brackwassermolasse				02 OMMj - Basis jüngere obere Meeresmolasse
0211	Middle upper marine molasse																			03 OMMa - Basis ältere Obere Meeresmolasse	02 OMMa - Basis Obere Meeresmolasse (Mittlerer Teil)	02 OMMa - Basis Obere Meeresmolasse (Mittlerer Teil)	base_UpperMarineMolasse_Ottnang_			Piller et al. (2004)
0212	Upper marine molasse															15 OMM1 - Tiefere Obere Meeresmolasse		TUSM-2019 - Top Untere Süsswassermolasse USM _Top Lower Freshwater Molasse_	lca_bw_btOM - Basis Obere Meeresmolasse		04 OMMe - Basis Obere Meeresmolasse (Untere Teil)	03 OMMe - Basis Obere Meeresmolassen (Unterer Teil)	base_OldestUpperMarineMolasse_Eggenburg_			Piller et al. (2004)
0213	Base upper North Sea Group	1-NU_tvd_on_offshore_merge_DGM50_ED50_UTM31 – Base Upper North Sea Group (~Basis Aquitanian)																								TNO-GSN (2019)
0214	Base Landau-Formation+												020_bhy_all_cut_rco_s01 - Basis Landau-Formation (Spätes Oligozän)
0215	Base lower freshwater molasse and younger upper marine molasse																	TUMM-2019 - Top Untere Meeresmolasse UMM _Top Lower Marine Molasse_	lca_bw_btUS - Basis Untere Suesswassermolasse	04 UMMj - Basis jüngere Untere Meeresmolasse	05 UMMj - Basis Untere Meeresmolasse (oberer Teil)	04 UMMj - Basis Untere Meeresmolasse (oberer Teil)	base_YoungerLowerMolasse_Eger_			Piller et al. (2004)
0216	Base Bausteinschichten																		lca_bw_btBSS - Basis Bausteinschichten	05a olB - Basis Bausteinschichten
0217	Base Chatian				02NE_b – Top Rupelian
0218	Base Rupelian			01_tolR - Basis Rupelian						ts_03_xxxx_02_005 – (Basis) Rupel Folge			040_bff_all_cut_rco_s01 - Basis Froidefontaine-Formation (Frühes Oligozän)													Kuhlmann & Knopf (2015)
0219	Base lower marine molasse																			05 UMMa - Basis Untere Meeresmolasse (Unterer Teil)	06 UMMa - Basis Untere Meeresmolasse (Unterer Teil)	05 UMMa - Basis Untere Meeresmolasse (unterer Teil)	base_OlderLowerMolasse_Rupel_			Piller et al. (2004)
0220	Base oldest molasse deposits															16 UM - die ältesten Ablagerungen der Molasse						06 AMM - Basis Älteste Untere Molasse	base_eozaen_OE
0221	Base upper Ypresian												050_bt_all_cut_rco_s01 - Basis Tertiär (~Oberes Ypresium)
0222	Base Seelandian	2-NLNM_tvd_on_offshore_merge_DGM50_ED50_UTM31 – Base North Sea Super Group (Top Dan, Basis Selandian)		02_t - Basis Tertiär (Top Dan, Basis Selandian)	03PA_b – Basis Paläogen																					TNO-GSN (2019); Kuhlmann & Knopf (2015); Doornenbal & Stevenson (2010)
0223	Base Cenozoic					gg_t_b - Basis Tertiär			InfluinsModellBasis_Kaenozoikum - Basis Känozoikum	ts_03_xxxx_30_999_PraeT - Basis Känozoikum	ts_10_ZwGe_30_999_PraeT - Basis Känozoikum	ts_06_NL_30_999_Pre-Tert_cut - Basis Känozoikum		02_bt_ges - Basis Tertiär			02 tM - Vorland- oder Faltenmolasse, ungegliedert	BCen-2019 - Basis Känozoikum BCen _Base Cenozoic/05_Top Kreide TCret _Top Cretaceous_ (im SW)	lca_bw_bt - Basis_Tertiär		07 tM - Basis Vorland- oder Faltenmolasse, von der BGE als Basis Tertiär definiert		base_tertiaer_OE	04_Cenozoic_Sediments_of_the_Upper_Rhine_Graben; 05_Cenozoic_Foreland_Molasse_Sediments		Geißler et al. (2014)
0301	Base Upper Cretaceous	3-CK_tvd_on_offshore_merge_DGM50_ED50_UTM31 – Base Chalk Group, Basis Oberkreide (Basis Cenomanian)		03_kro - Basis Oberkreide (Basis Cenomanian)	04KR_b – Basis Kreide	gg_kro_b – Basis Oberkreide																				TNO-GSN (2019); Kuhlmann & Knopf (2015)
0302	Base Valangian	4-KN_tvd_on_offshore_merge_DGM50_ED50_UTM31 – Base Rijnland Group (Basis Valangian)		04_kru-marin - Basis marine Unterkreide (Basis Valanginian)		gg_kr_b – Basis Kreide/Top Wealden																				TNO-GSN (2019); Kuhlmann & Knopf (2015); Doornenbal & Stevenson (2010)
0303	Base Cretaceous			04_kru - Basis Unterkreide		Wealden_b - Basis Wealden										17 kr - Basis Kreide	03 kr - Basis Kreide	TUMa-2019 - Top Oberer Malm TUMa _Top Upper Malm_ (nur im SW)		06 krP - Basis Wealden (Top Weißjura)	08 kr - Basis Wealden (Top Weißjura)	07 krP - Basis Wealden (Top Weißjura)	base_oberkreide_OE	09_Mesozoic_Jurassic		Franke (2020); Kuhlmann & Knopf (2015); Schneider et al. (2012)
0401	Base Wohlgeschichtete Kalke																		lca_bw_bjoW - Basis Wohlgeschichtete Kalke
0402	Top Effingenhorizont																	TLMa-2019 - Top Unterer Malm TLMa _Top Lower Malm_
0403	Base Malm	5-S_tvd_on_offshore_merge_DGM50_ED50_UTM31 – Base Nedersaksen en Schieland Super Group (Basis Oxfordian)		05_jo - Basis Malm (Basis Oxfordian)									060_bjo_all_cut_rco_s01 - Basis Oberjura (Mittleres Oxfordian, Top Kandern-Formation)			18 w - Basis Malm	04 wj - Basis Weißjura	TDo-2019 - Top Dogger TDo _Top Dogger_	lca_bw_bjo - Basis Oberjura	07 b - Top Braunjura-Gruppe	09 b - Top Braunjura-Gruppe	08 b - Top Braunjura-Gruppe	base_malm_OE			TNO-GSN (2019), Kuhlmann & Knopf (2015), Doornenbal & Stevenson (2010)
0404	Base Kandernformation													03_bjo_ges – Basis Oberjura (Basis Kandern-Formation)												SGD (2013a)
0405	Base Dogger γ															19 b3 - Basis höherer Dogger (Dogger γ)										SGD (2013a)
0406	Top Hauptrogenstein												070_thr_all_cut_rco_s01 - Top Hauptrogenstein (Basis Bathonium)													SGD (2013a)
0407	Top Opalinuston															20 b2 - Basis Dogger β (Aalénium)										SGD (2013a)
0408	Base Dogger			06_jm - Basis Dogger										04_bjm_ges – Basis Mitteljura			05 b - Basis Braunjura	TLi-2019 - Top Lias TLi _Top Lias_	lca_bw_bjm - Basis Mitteljura	08 l - Top Schwarzjura-Gruppe	10 l - Top Schwarzjura-Gruppe		base_dogger_OE			Kuhlmann & Knopf (2015)
0409	Base Posidonia Shale Formation	6-ATPO_tvd_on_offshore_merge_DGM50_ED50_UTM31 – Base Posidonia Shale Formation																								Doornenbal & Stevenson (2010)
0410	Base Jurassic	7-AT_tvd_on_offshore_merge_DGM50_ED50_UTM31 – Base Altena Group		07_ju - Basis Lias	05JU_b – Basis Jura, Basis Sleen Formation	gg_j_b – Basis Jura	s_geologie_MuKaKeuper – Basis Lias		InfluinsModellBasis_ju – Basis Jura				090_bju_all_cut_rco_s01 - Basis Unterjura (Hettangian)	05_bju_ges – Basis Unterjura			06 l - Basis Schwarzjura	TKeu-2019 - Top Keuper TKeu _Top Keuper_	lca_bw_bju – Basis Unterjura		11 tr - Top Trias Gruppe			10_Mesozoic_Triassic	Fig. 7,8,9 - Top Triassic	TNO-GSN (2019); Kuhlmann & Knopf (2015); Doornenbal & Stevenson (2010)
0501	Base upper Keuper			08_ko - Basis Rhät					InfluinsModellBasis_ko – Basis Oberer Keuper							21 b - Basis Oberer Keuper				09a km - Top Mittlerer Keuper						Kuhlmann & Knopf (2015)
0502	Base middle Keuper								InfluinsModellBasis_kmGU – Basis Mittlerer Keuper										lca_bw_bkm - Basis Mittlerer Keuper	09b ku - Top Unterer Keuper
0503	Base Keuper			09_ku - Basis Unterer Keuper (Basis Lettenkeuper)					InfluinsModellBasis_ku – Basis Unterer Keuper				100_bku_all_cut_rco_s01 - Basis Keuper (Basis Lettenkeuper)	06_bk_ges – Basis Keuper	Muka_Ok		07 k - Basis Keuper	TMus-2019 - Top Muschelkalk TMus _Top Muschelkalk_	lca_bw_bk - Basis Keuper	09c mo - Top Oberer Muschelkalk					Fig. 6,7,8,9 - Top Muschelkalk	Kuhlmann & Knopf (2015)
0504	Base Ceratitenschichten								InfluinsModellBasis_moC – Basis Ceratitenschichten (oberer Muschelkalk)																	SGD (2013c)
0505	Base upper Muschelkalk								InfluinsModellBasis_moT – Basis Trochitenkalk (oberer Muschelkalk)				110_tms_all_cut_rco_s01 - Top Muschelkalksalinar (Mittlere Muschelkalk, inkl Diemel-Formation)							09d mm - Top Mittlerer Muschelkalk (?)						SGD (2013c)
0506	Base Diemel formation																		lca_bw_bmmD - Basis_Diemel-Formation							(Regierungspräsidium Freiburg, Landesamt für Geologie, Rohstoffe und Bergbau, 2019)
0507	Base middle Muschelkalk								InfluinsModellBasis_mm – Basis mittlerer Muschelkalk
0508	Base Muschelkalk						s_geologie_Buntsandstein – Basis Muschelkalk		InfluinsModellBasis_mu – Basis Unterer Muschelkalk				120_bmu_all_cut_rco_s01 - Basis Muschelkalk	07_bm_ges – Basis Muschelkalk	Bunts_Ok	22 tr2 - Basis Muschelkalk									Fig. 6,7,8,9 - Top Buntsandstein
0509	Base upper Buntsandstein	8-RN_tvd_on_offshore_merge_DGM50_ED50_UTM31 – Base Upper Germanic Trias Group		10_so - Basis Oberer Buntsandstein (Basis Rötsalinar)					InfluinsModellBasis_so – Basis oberer Buntsandstein (Röt)																	TNO-GSN (2019), Kuhlmann & Knopf (2015)
0510	Base middle Buntsandstein			11_sm - Basis Mittlerer Buntsandstein					InfluinsModellBasis_sm – Basis mittlerer Buntsandstein																	TNO-GSN (2019), Kuhlmann & Knopf (2015)
0511	Base Triassic	9-RB_tvd_on_offshore_merge_DGM50_ED50_UTM31 – Base Lower Germanic Trias Group		12_su - Basis Unterer Buntsandstein (Basis Calvörde Folge)		gg_tr_b – Basis Trias	s_geologie_Zechstein - Basis Buntsandstein		InfluinsModellBasis_su – Basis unterer Buntsandstein				130_btr_all_cut_rco_s01 – Basis Trias	08_bs_ges – Basis Buntsandstein (Basis Eck-Formation)	Trias_Uk			BMes-2019 - Basis Mesozoikum BMes _Base Mesozoic_	lca_bw_btr - Basis Trias, „Top Paläozoikum“					11_Zechstein_Salt	Fig. 6,7,8,9 - Top Buntsandstein	TNO-GSN (2019), Kuhlmann & Knopf (2015)
0601	Base Zechstein (salt)	10-ZE_tvd_on_offshore_merge_DGM50_ED50_UTM31 – Base Zechstein Group		13_z - Basis Zechstein (Basis z1)		gg_z_b – Basis Zechstein	s_geologie_Rotliegend – Basis Zechstein		InfluinsModellBasis_z1ANa_z2Ta – Basis Zechstein															12_Zechstein_Carbonates; 13_Permo-Carboniferous_Rotliegend_Sediments		TNO-GSN (2019); Kuhlmann & Knopf (2015); Grabert (1998); Seidel (2003); LGB-RLP (2005); Wong et al. (2007); Bachmann et al. (2008); Reinhold et al. (2014); DSK et al. (2020); Becker et al. (2021)
0602	Base Zechstein (non-saline sediments)	10-ZE_tvd_on_offshore_merge_DGM50_ED50_UTM31 – Base Zechstein Group				gg_z_b – Basis Zechstein	s_geologie_Rotliegend – Basis Zechstein							09_bz_ges – Basis Zechstein										13_Permo-Carboniferous_Rotliegend_Sediments		TNO-GSN (2019); Kuhlmann & Knopf (2015); Grabert (1998); Seidel (2003); LGB-RLP (2005); Wong et al. (2007); Bachmann et al. (2008); Reinhold et al. (2014); DSK et al. (2020); Becker et al. (2021)
0603	Base upper Rotliegend	11-RO_tvd_on_offshore_merge_DGM50_ED50_UTM31 – Base Upper Rotliegend Group			06TR_07PE_b – Basis Perm-Trias bzw. Basis von Keuper, Muschelkalk, Röt, Buntsandstein und Helchteren Formation																					Dusar (2011); TNO-GSN (2019)
0604	Base Rotliegend (sediments)																							14_Permo-Carboniferous_Volcanics_of_Northern_Germany
0605	Base Rotliegend (volcanic rocks)																							15_Pre-Permian_Sedimentary_Units_of_Northern_Germany
0606	Base Rotliegend (undifferentiated)					gg_r_b – Basis Rotliegend	s_geologie_PraePerm – Basis Perm		InfluinsModellBasis_r_co – Basis Rotliegend					10_brco_ges - Basis Basis Rotliegend/Oberkarbon (Stefan)		23 p - Basis Ablagerungen Permokarbontröge	08 pu - Basis Permokarbon	BPC-2019/BPC-assumed-2019 - 13_Basis Permokarbon BPC _Base Permocarboniferous/13_Basis Permokarbon vermutet BPC vermutet	lca_bw_bco - Basis Rotliegend						Fig. 6,7,8,9 - Top Paleozoic metasedimentary rocks and Varsican nappe (BSF1)
0701	Base Westfalium	12-DCC_tvd_onshore_DGM50_RD – Base Caumer Sub Group (Pennsylvanian)			0801CA_We_b – Basis Westphalian																					Doornenbal & Stevenson (2010)
0702	Base Pennsylvanian		top_dinant_final_tvd – Top Dinantian (Mississippian)		0802CA_Na_b – Basis Namurian
0703	Base Carboniferous		base_dinantien_tvd_final - Base Dinantian (Mississippian)		0803CA_Di_b – Basis Dinantian, Basis Karbon	gg_c_b – Basis Karbon
0801	Basse middle Devonian					gg_dm_b – Basis Mitteldevon
0802	Base Devonian				09DE_b – Basis Devon
0901	Base Variscan nappes							GiessenHarzNappe_RHZ_WeinertEtAl_20201208																	Fig. 6,7,8,9 - Base Paleozoic metasedimentary rocks and Varsican nappe (BSF1)
1000	Top Basement												170_tkr_all_cut_rco_s01 - Top Grundgebirge							10 KGr - Top Grundgebirge	12 KGr - Top Grundgebirge	09 KGr - Top Grundgebirge

## Sheet: References
Anikiev, D., Lechel, A., Gomez Dacal, M. L., Bott, J., Cacace, M., and Scheck-Wenderoth, M.: A three-dimensional lithospheric-scale thermal model of Germany, Adv. Geosci., 49, 225–234, https://doi.org/10.5194/adgeo-49-225-2019, 2019.
Bachmann, G. H., Ehling, B.-C., Eichner, R., and Schwab, M. (Eds.): Geologie von Sachsen-Anhalt, Schweizerbart Science Publishers, Stuttgart, 689 pp., ISBN 978-3-510-65240-2, 2008.
Bär, K., Schäffer, R., Weinert, S., and Sass, I.: Verbundprojekt „Hessen 3D 2.0“ 3D-Modell der geothermischen Tiefenpotenziale von Hessen - Petrothermale Potenziale und Mitteltiefe Potenziale zur Wärmenutzung und Wärmespeicherung (Teilvorhaben A): Schlussbericht zum BMWi-geförderten Verbundprojekt „Hessen 3D 2.0“ (FKZ 0325944A), 194 pp., https://doi.org/10.2314/KXP:1795616571, 2021.
Becker, R., Reischmann, T., and HLNUG (Eds.): Geologie von Hessen, Schweizerbart Science Publishers, Stuttgart, Germany, 705 pp., ISBN 978-3-510-65442-0, 2021.
BGR, LAGB, LBEG, LBGR, LLUR, and LUNG: 3D-Modell des geologischen Untergrundes des Norddeutschen Beckens (Projekt TUNB): Erstveröffentlichung 2021, Version 2022, https://gst.bgr.de (last access: 13 January 2026), 2022.
Danielson, J. J. and Gesch, D. B.: Global multi-resolution terrain elevation data 2010 (GMTED2010): Mean statistic, 30 arc-seconds, Open-File Report, 2011-1073, U.S. Geological Survey [data set], https://doi.org/10.3133/ofr20111073, 2011.
Deckers, J., de Koninck, R., Bos, S., Broothaers, M., Dirix K., Hambsch L., Lagrou, D., Lanckacker, T., Matthijs, J., Rombaut, B., van Baelen, K., and van Haren, T.: Geologisch (G3Dv3) en hydrogeologisch (H3D) 3D-lagenmodel van Vlaanderen, https://www.dov.vlaanderen.be/page/geologisch-3d-model-g3dv3 (last access: 13 January 2026), 2019.
Donner, E.: Geologisches 3D Modell Niederbayern. Status: Schematisches Volumenmodell, LfU, https://www.3dportal.lfu.bayern.de/ (last access: 13 January 2026), 2020b.
Doornenbal, H. and Stevenson, A.: Petroleum Geological Atlas of the Southern Permian Basin Area, EAGE Publications b.v., Houten, 342 pp., ISBN 978-90-73781-61-0, 2010.
DSK, Paul, J., and Heggemann, H. (Eds.): Stratigraphie von Deutschland XII - Zechstein, Schriftenreihe der Deutschen Gesellschaft für Geowissenschaften, 89, Schweizerbart Science Publishers, Hannover, 647 pp., ISBN 978-3-510-49241-1, 2020.
Dusar, M.: The Helchteren Formation, National Commission for Stratigraphy Belgium, http://ncs.naturalsciences.be/lithostratigraphy/Helchteren-Formation (last access: 20 May 2025), 2011.
Fazlikhani, H., Bauer, W., and Stollhofen, H.: Variscan structures and their control on latest to post-Variscan basin architecture: insights from the westernmost Bohemian Massif and southeastern Germany, Solid Earth, 13, 393–416, https://doi.org/10.5194/se-13-393-2022, 2022.
Franke, D.: Regionale Geologie von Ostdeutschland - Ein Kompendium, http://www.regionalgeologie-ost.de/Einfuehrung.htm (last access: 14 May 2025), 2020.
Geißler, V., Gauer, A., and Görne, S.: Innovative digitale Geomodelle 2020 - Teil 1, Sächsisches Landesamt für Umwelt, Landwirtschaft und Geologie, Dresden, Schriftenreihe des LfULG, 22, 108 pp., https://doi.org/10.4126/98-005769493, https://demo.giga-infosystems.com/webgui/?viewHash=32aa9f455ee89837e3e33725bcaf23f2, 2014.
Geologischer Dienst NRW: Geowissenschaftliche Daten: Landesmodell NRW (2022), © Geologischer Dienst NRW, https://www.gd.nrw.de/ge_eb_3d_modelle.htm (last access: 13 January 2026), 2022.
GeoMol LCA-Projectteam: GeoMol pilot area Lake Constance - Allgäu (Baden-Wuerttemberg), LGRB Kartenserver, http://maps.geomol.eu/ (last access: 13 January 2026), 2015a.
GeoMol LCA-Projectteam: GeoMol pilot area Lake Constance - Allgäu (Bavaria), LfU, https://www.3dportal.lfu.bayern.de/ (last access: 13 January 2026), 2015b.
GeoMol Team: GeoMol framework model (Bavaria), LfU, https://www.3dportal.lfu.bayern.de/ (last access: 13 January 2026), 2015b.
GeoMol UA-UB-Projectteam: GeoMol pilot area Upper Austria – Upper Bavaria (Bavaria), LfU, https://www.3dportal.lfu.bayern.de/ (last access: 13 January 2026), 2015.
GeORG-Projektteam: Geopotentiale des tieferen Untergrundes im Oberrheingraben: Fachlich-Technischer Abschlussbericht des INTERREG-Projekts GeORG, Teil 4, Freiburg i. Br., 104 pp., http://www.geopotenziale.eu/products/atlas/pdf/atlas_web.pdf (last access: 13 January 2026), 2013.
Görne, S.: Geologisches 3D Modell NW-Sachsen, LfULG, http://lsnq.de/3dnwsachsen (last access: 13 January 2026), 2011.
Görne, S.: Geologisches 3D Modell des "Zwischengebietes", LfULG, http://lsnq.de/3dzwischen (last access: 13 January 2026), 2012b.
Görne, S. and Geißler, V.: Geologisches 3D Modell der Niederlausitz, LfULG, http://lsnq.de/3dniedlau (last access: 13 January 2026), 2015.
Grabert, H.: Abriß der Geologie von Nordrhein-Westfalen, Schweizerbart Science Publishers, Stuttgart, Germany, 351 pp., ISBN 978-3-510-65187-0, 1998.
Heckeberg, N., Pipperr, M., Läuchli, B., Heimann, F. U., and Reichenbacher, B.: The Upper Marine Molasse (Burdigalian, Ottnangian) in Southwest Germany facies interpretation and a new lithostratigraphic terminology, Zeitschrift der Deutschen Gesellschaft fur Geowissenschaften, 161, 285–302, https://doi.org/10.1127/1860-1804/2010/0161-0285, 2010.
Kuhlmann, G. and Knopf, S.: Potenziale des unterirdischen Speicher- und Wirtschaftsraumes im Norddeutschen Becken (TUNB): Abschlussbericht der AG 1 - Stratigraphie, BGR, 24 pp., https://www.bgr.bund.de/DE/Themen/Nutzung-tieferer-Untergrund/Downloads/TUNB_AB-AG1_Stratigraphie.html?nn=864286&__blob=publicationFile (last access: 13 January 2026), 2015.
LfU: Bayerischer Geothermieatlas, STMWI, 135 pp., https://www.stmwi.bayern.de/energie/erneuerbare-energien/tiefengeothermie/ (last access: 13 January 2026), 2022.
LGB-RLP (Ed.): Geologie von Rheinland-Pfalz, Schweizerbart Science Publishers, Stuttgart, Germany, 400 pp., ISBN 978-3-510-65215-0, 2005.
Pfleiderer, S., Götzl, G., Bottig, M., Brüstle, A. K., Porpaczy, C., Schreilechner, M., Eichkitz, C., Jud, M., Sachsenhofer, R., Zosseder, K., Casper, S., Goldbrunner, J., Kriegl, C., Kolmer, C., and Diepolder, G. W.: GeoMol - geologische 3D-Modellierung des österreichischen Molassebeckens und Anwendungen in der Hydrogeologie und Geothermie im Grenzgebiet von Oberösterreich und Bayern, Abhandlung…
Piller, W. E., Egger, H., Erhart, C. W., Gross, M., Harzhauser, M., Hubmann, B., van Husen, D., Krenmayr, H.-G., Krystyn, L., Lein, R., Lukeneder, A., and Mandl, G.: Die stratigraphische Tabelle von Österreich 2004 (sedimentäre Schichtfolgen), https://opac.geologie.ac.at/ais312/dokumente/Stratigraph_Tabelle_Oesterreich_2004.pdf (last access: 13 January 2026), 2004.
Regierungspräsidium Freiburg, Landesamt für Geologie, Rohstoffe und Bergbau: Geowissenschaftliches Informationsportal LGRBwissen - Mittlerer Muschelkalk, https://lgrbwissen.lgrb-bw.de/geologie/schichtenfolge/trias/muschelkalk/mittlerer-muschelkalk (last access: 26 May 2025), 2019.
Reinhold, K., Hammer, J., and Pusch, M.: Verbreitung und Eigenschaften flach lagernder Salzschichten in Deutschland (BASAL): Verbreitung, Zusammensetzung und geologische Lagerungsverhältnisse flach lagernder Steinsalzfolgen in Deutschland, Zwischenbericht, Hannover, 98 pp., https://www.bgr.bund.de/DE/Themen/Endlagerung/Downloads/Endlagerforschung/2_Steinsalz/2014-12-10_BGR_Basal_ZB_Verbreitung_Ei…
Ringseis, H., Doppler, G., and Meyer, R. K.: Geologisches 3D-Modell Region Ingolstadt, LfU, https://www.3dportal.lfu.bayern.de/ (last access: 13 January 2026), 2020b.
Rupf, I. and Nitsch, E.: Das Geologische Landesmodell von Baden-Württtemberg: Datengrundlagen, technische Umsetzung und erste geologische Ergebnisse, Ladesamt für Geologie, Rohstoffe und Bergbau, Freiburg i. Br., LGRB-Informationen, 21, 81 pp., https://produkte.lgrb-bw.de/docPool/c623_data.pdf (last access: 13 January 2026), 2008.
Schneider, M. and Thomas, L.: Wissenschaftliche und technische Grundlagen zur strukturgeologischen und hydrogeologischen Charakterisierung tiefer geothermisch genutzter Grundwasserleiter am Beispiel des süddeutschen Molassebeckens, Endbericht, 237 pp., https://www.erdwerk.com/sites/default/files/users/user14/25_2012_Grundlagen_Molassebeckens_Forschungsvorhaben_Steiner_DE.pdf (last access: 13 Janu…
Seidel, G.: Geologie von Thüringen, 2. Auflage, Schweizerbart Science Publishers, Stuttgart, Germany, 601 pp., ISBN 978-3-510-65205-1, 2003.
SGD: Geologische Kartieranleitung: Stratigraphische Tabellen, Bayern, Jura, Germanische Schichtenfolge: Dogger, Staatliche Geologische Dienste, https://www.geokartieranleitung.de/Portals/10/Stratigraphie/bay/jura/raet-dogger.PDF (last access: 26 May 2025), 2013a.
SGD: Geologische Kartieranleitung: Stratigraphische Tabellen, Bayern, Tertiär, Obere Meeresmolasse, Staatliche Geologische Dienste, https://www.geokartieranleitung.de/Portals/10/Stratigraphie/bay/tert/6---Obere-Meeresmolasse.PDF (last access: 26 May 2025), 2013b.
SGD: Geologische Kartieranleitung: Stratigraphische Tabellen, Thüringen, Trias, Muschelkalk, Oberer Muschelkalk, Staatliche Geologische Dienste, https://www.geokartieranleitung.de/Portals/10/Stratigraphie/th/tri/musch/mo.jpg (last access: 26 May 2025), 2013c.
Swisstopo: GeoMol - Geological Model, swisstopo, https://viewer.swissgeol.ch (last access: 8 September 2023), 2019.
TLUBN: Geologisches 3D-Modell „Thüringer Becken“, NIBIS [data set], http://nibis.lbeg.de/cardoMap3/?th=1411 (last access: 13 January 2026), 2014.
TNO: Digital Geological Model (DGM) deep V5 on- and offshore, NLOG [data set], https://www.nlog.nl/en/dgm-deep-v5-and-offshore (last access: 13 January 2026), 2019a.
TNO: SCAN - 2D Seismic Interpretation and Depth Conversion for Dinantian, NLOG [data set], https://www.nlog.nl/en/scan-2d-seismic-interpretation-and-depth-conversion-dinantian (last access: 13 January 2026), 2019b.
TNO-GSN: Tectonostratigraphic table of the Netherlands, https://www.dinoloket.nl/sites/default/files/nomenclator/stratigrafische_tabellen/25_Tectonostratigraphic_table_EN.pdf (last access: 14 May 2025), 2019.
Weinert, S., Bär, K., and Sass, I.: A geological 3D structural model of the Hessian Rhenohercynian basement, TUdatalib [data set], https://doi.org/10.48328/tudatalib-871, 2022.
Wong, T. E., Batjes, D. A. J., and de Jager, J. (Eds.): Geology of the Netherlands, Royal Netherlands Acad. of Arts and Sciences, Amsterdam, 354 pp., ISBN 978-9069844817, 2007.
