# Supplementary material for: A unified 3D geological model for Germany and adjacent areas
Source: Copernicus journal article supplement (doi:10.5194/essd-18-585-2026), 2026-01-22
Supplement: Supplementary file 1 [file Table S3 - Overview of input models.pdf › Table S3 - Overview of input models.pdf]

| Short name         | Full name                                                                                                                                                                 | Reference                            | Reference number |
|--------------------|---------------------------------------------------------------------------------------------------------------------------------------------------------------------------|--------------------------------------|------------------|
| Netherlands        | Digital Geological Model (DGM) deep V5 on- and offshore                                                                                                                   | TNO (2019a)                          | 1                |
| Netherlands 2      | SCAN - 2D Seismic Interpretation and Depth Conversion for Dinantian                                                                                                       | TNO (2019b)                          | 2                |
| TUNB               | 3D-Modell des geologischen Untergrundes des Norddeutschen Beckens                                                                                                         | BGR et al. (2022)                    | 3                |
| Vlaanderen         | Geologisch (G3Dv3) en hydrogeologisch (H3D) 3D-lagenmodel van Vlaanderen                                                                                                  | Deckers et al. (2019)                | 4                |
| Landesmodell NRW   | Landesmodell Nordrhein-Westfalen                                                                                                                                          | Geologischer Dienst NRW (2022)       | 5                |
| Hessen             | Hessen 3D 2.0                                                                                                                                                             | Bär et al. (2021)                    | 6                |
| Hessen 2           | Hessen 3D 2.0 Erweiterung                                                                                                                                                 | Weinert et al. (2022)                | 7                |
| Thüringer Becken   | Geologisches 3D-Modell „Thüringer Becken“                                                                                                                                 | TLUBN (2014)                         | 8                |
| NW Sachsen         | Geologisches 3D Modell NW-Sachsen                                                                                                                                         | Görne (2011)                         | 9                |
| SN Zwischengebiet  | Geologisches 3D Modell des "Zwischengebietes"                                                                                                                             | Görne (2012b)                        | 10               |
| Niederlausitz      | Geologisches 3D Modell der Niederlausitz                                                                                                                                  | Görne & Geißler (2015)               | 11               |
| Elbtalzone         | Geologisches 3D Modell der Elbtalzone                                                                                                                                     | Görne (2012a)                        | 12               |
| Erzgebirge         | 3D Model of the Erzgebirge                                                                                                                                                | Kirsch et al. (2017)                 | 13               |
| GeORG              | Geopotentiale des tieferen Untergrundes im Oberrheingraben                                                                                                                | GeORG-Projektteam (2013)             | 14               |
| Landesmodell BW    | Geologisches Landesmodell von Baden-Württemberg                                                                                                                           | Rupf & Nitsch (2008)                 | 15               |
| Geothermieatlas BY | Bayerischer Geothermieatlas                                                                                                                                               | LfU (2022)                           | 16               |
| Ingolstadt         | Geologisches 3D-Modell Region Ingolstadt                                                                                                                                  | Ringseis et al. (2020b)              | 17               |
| Niederbayern       | Geologisches 3D Modell Niederbayern                                                                                                                                       | Donner (2020b)                       | 18               |
| GeoMol Swiss       | GeoMol Geological Model 2019                                                                                                                                              | Swisstopo (2019)                     | 19               |
| GeoMol LCA BW      | GeoMol pilot area Lake Constance - Allgäu (Baden-Wuerttemberg)                                                                                                            | GeoMol LCA-Projectteam (2015a)       | 20               |
| GeoMol LCA BY      | GeoMol pilot area Lake Constance - Allgäu (Bavaria)                                                                                                                       | GeoMol LCA-Projectteam (2015b)       | 21               |
| GeoMol FWM BY      | GeoMol framework model (Bavaria)                                                                                                                                          | GeoMol Team (2015b)                  | 22               |
| GeoMol UA-UB BY    | GeoMol pilot area Upper Austria – Upper Bavaria (Bavaria)                                                                                                                 | GeoMol UA-UB-Projectteam (2015)      | 23               |
| GeoMol Austria     | GeoMol – Geologische 3D-Modellierung des österreichischen Molassebeckens und Anwendungen in der Hydrogeologie und Geothermie im Grenzgebiet von Oberösterreich und Bayern | Pfleiderer et al. (2016)             | 24               |
| CEBS               | Central European Basin model                                                                                                                                              | Maystrenko & Scheck-Wenderoth (2013) | 25               |
| 3DD                | 3-D-Deutschland                                                                                                                                                           | Anikiev et al. (2019)                | 26               |
| LSCE               | Lithospheric structure of Central Europe                                                                                                                                  | Tašárová et al. (2016)               | 27               |
