# Supplementary material for: A unified 3D geological model for Germany and adjacent areas
Source: Copernicus journal article supplement (doi:10.5194/essd-18-585-2026), 2026-01-22
Supplement: Supplementary file 2 [file Table S2 - Model units.xlsx]

## Sheet: Model units
ID	unit name	Netherlands	Netherlands 2	TUNB	Vlaanderen	Landesmodell NRW	Hessen	Hessen 2	Thueringer Becken	NW Sachsen	SN Zwischengebiet	Niederlausitz	Elbtalzone	Erzgebirge	GeORG	Landesmodell BW	Geothermieatlas BY	Ingolstadt	Niederbayern	GeoMol Swiss	GeoMol LCA BW	GeoMol LCA BY	GeoMol FWM BY	GeoMol UA-UB BY	GeoMol Austria	CEBS	3DD	LSCE	FRANKEN Seismic	GEBCO bathymetric	GMTED	Reinhold 2005	Hurtig 1992	Sommaruga 1999	ECORS Nord	DEKORP PQ2	EGT	Lindner 2004	Oncken 2000	DEKORP 2S	Schintgen 2015	ZENTROSEIS	DEKORP MVE	DEKORP 4	GRANU 95	Guy 2011	DEKORP 3B	Korsch 1995	Meschede 2019
		TNO (2019a)	TNO (2019b)	BGR et al. (2022)	Deckers et al. (2019)	Geologischer Dienst NRW (2022)	Bär et al. (2021)	Weinert et al. (2022)	TLUBN (2014)	Görne (2011)	Görne (2012b)	Görne & Geißler (2015)	Görne (2012a)	Kirsch et al. (2017)	GeORG-Projektteam (2013)	Rupf & Nitsch (2008)	LfU (2022)	Ringseis et al. (2020b)	Donner (2020b)	Swisstopo (2019)	GeoMol LCA-Projectteam (2015a)	GeoMol LCA-Projectteam (2015b)	GeoMol Team (2015b)	GeoMol UA-UB-Projectteam (2015)	Pfleiderer et al. (2016)	Maystrenko & Scheck-Wenderoth (2013)	Anikiev et al. (2019)	Tašárová et al. (2016)	Fazlikhani et al. (2022)	GEBCO Bathymetric Compilation Group (2022)	Danielson & Gesch (2011)	Reinhold (2005)	Hurtig et al. (1992)	Sommaruga (1999)	Cazes et al. (1985)	Bachmann et al. (1999)	Blundell et al. (1992)	Lindner et al. (2004)	Oncken et al. (2000)	Reichert (1988)	Schintgen (2015)	Reinhold (2005)	Behr et al. (1994)	DEKORP Research Group (1987)	Enderle et al. (1998)	Guy et al. (2011)	Heinrichs et al. (1994)	Korsch & Schäfer (1995)	Meschede & Warr (2019)
0001																															mn30_grd
0002	Water																													gebco_2022_sub_ice_n90.0_s0.0_w0.0_e90.0
0101	Cenozoic volcanic rocks																										03_Cenozoic_Sediments_of_the_North_German_Basin
0102	Low terrace and flood plain sediments (Quarternary)																	01 q7 + altm
0103	High lying terrace (Quarternary)																	02 q6t
0104	Medium terrace (Quarternary)																	03 q5
0105	Sheet gravel (Quarternary)																	04 q3
0106	Quarternary				01Q_b	gg_q_b				ts_03_2465_01_000_Quart; ts_03_2466_01_000_Quart; ts_03_2565_01_000_Quart; ts_03_2566_01_000_Quart; ts_03_2665_01_000_Quart; ts_03_2666_01_000_Quart	ts_10_ZwGe_01_000_Quart	ts_06_NL_02_000_Quart				01_bq_ges			01 q,,		lca_bw_bq	01a q,,	01a q,,	01a q,,
0201	Quarternary + Pliocene														010_blg_all_uncut_outrop_s01
0202	Younger upper freshwater molasse																	08 OSM5
0203	Gravel dominating middle upper freshwater molasse																	09 OSM4
0204	Boulder sand dominating middle upper freshwater molasse																	10 OSM3
0205	Older upper freshwater molasse																	11 OSM2
0206	Upper freswater molasse																				lca_bw_btOS	01b OSMa	01b OSMa	01b OSMa
0207	Quarternary + Upper freswater molasse																			TOMM-2019					base_UpperFreshwaterMolasse_Karpat_
0208	Oldest upper freshwater molasse + Younger upper brackish molasse																	12 SM
0209	Grimmelfinger Schichten																	13 OBM1
0210	Upper brackish molasse + Steinhoefe formation																				lca_bw_btSH
0211	Baltringen formation																				lca_bw_btBA
0212	Middle and older upper brackish molasse + Younger upper marine molasse																	14 BM
0213	Upper brackish molasse + Younger upper marine molasse																					02 OMMj
0214	Upper brackish molasse + Younger und middle upper marine molasse																						02 OMMa	02 OMMa	base_UpperMarineMolasse_Ottnang_
0215	Middle upper marine molasse																					03 OMMa
0216	Older upper marine molasse																						04 OMMe	03 OMMe	base_OldestUpperMarineMolasse_Eggenburg_
0217	Middle and older upper marine molasse																	15 OMM1
0218	Upper marine molasse below Baltringer Schichten																				lca_bw_btOM
0219	Upper brackish molasse + Upper marine molasse																			TUSM-2019
0220	Upper North Sea Group	1-NU_tvd_on_offshore_merge_DGM50_ED50_UTM31
0221	Miocene + Parts of Chattian														020_bhy_all_cut_rco_s01
0222	Lower freshwater molasse																			TUMM-2019	lca_bw_btUS
0223	Younger lower marine molasse																					04 UMMj	05 UMMj	04 UMMj	base_YoungerLowerMolasse_Eger_
0224	Bausteinschichten																				lca_bw_btBSS	05a olB
0225	Cenozoic until Rupelian				02NE_b
0226	Froidefontaine, Niederroedern and Bruchsal formation														040_bff_all_cut_rco_s01
0227	Cenozoic (incl. Rupelian)									ts_03_2465_02_005_Ru; ts_03_2466_02_005_Ru; ts_03_2565_02_005_Ru; ts_03_2566_02_005_Ru; ts_03_2665_02_005_Ru; ts_03_2666_02_005_Ru
0228	Quarternary + Cenozoic (incl. Rupelian)			01_tolR
0229	Older lower marine molasse (without Bausteinschichten)																					05 UMMa
0230	Older lower marine molasse																						06 UMMa	05 UMMa	base_OlderLowerMolasse_Rupel_
0231	Oldest molasse deposits																							06 AMM	base_eozaen_OE
0232	Lower marine molasse + Oldest molasse deposits																	16 UM
0233	Lower Oligocene (below Froidefontaine formation) + Eocene														050_bt_all_cut_rco_s01
0234	Eocene + Paleocene (without Danian)			02_t
0235	Rupelian + Eocene + Paleocene				03PA_b
0236	Middle and Lower North Sea Group	2-NLNM_tvd_on_offshore_merge_DGM50_ED50_UTM31
0237	Eocene + Paleocene									ts_03_2465_30_999_PraeT; ts_03_2466_30_999_PraeT; ts_03_2565_30_999_PraeT; ts_03_2566_30_999_PraeT; ts_03_2665_30_999_PraeT; ts_03_2666_30_999_PraeT
0238	Lower marine molasse (without Bausteinschichten)																				lca_bw_bt
0239	Lower marine molasse + Oldest molasse deposits																			BCen-2019
0240	Paleocene																								base_tertiaer_OE
0241	Oldest molasse deposits																						07 tM
0242	Molasse sediments																		02 tM
0243	Cenozoic (without Quarternary)					gg_t_b					ts_10_ZwGe_30_999_PraeT_cut	ts_06_NL_30_999_Pre-Tert_cut				02_bt_ges
0244	Cenozoic								InfluinsModellBasis_Kaenozoikum																		04_Cenozoic_Sediments_of_the_Upper_Rhine_Graben; 05_Cenozoic_Foreland_Molasse_Sediments
0301	Upper Cretaceous	3-CK_tvd_on_offshore_merge_DGM50_ED50_UTM31		03_kro	04KR_b	gg_kro_b
0302	Marine Lower Cretaceous	4-KN_tvd_on_offshore_merge_DGM50_ED50_UTM31		04_kru-marin		gg_kr_b
0303	Wealden formation			04_kru		Wealden_b
0304	Upper Cretaceous																		03 kr					07 krP	base_oberkreide_OE
0305	Upper Cretaceous + Albian																	17 kr
0306	Middle and Upper Cretaceous																						08 kr
0307	Oldest molasse deposits																					06 krP
0308	Cretaceous																			TUMa-2019							09_Mesozoic_Jurassic
0401	Upper Jurassic (below Wohlgeschichtete Kalke)																				lca_bw_bjoW
0402	Upper Malm																			TLMa-2019
0403	Lower Malm																			TDo-2019
0404	Malm			05_ST_jo											060_bjo_all_cut_rco_s01			18 w	04 wj			07 b	09 b	08 b	base_malm_OE
0405	Wealden formation + Malm	5-S_tvd_on_offshore_merge_DGM50_ED50_UTM31		05_jo
0406	Malm + Kandern formation															03_bjo_ges
0407	Dogger (Gamma to Zeta)																	19 b3
0408	Dogger (above Hauptrogenstein)														070_thr_all_cut_rco_s01
0409	Dogger (Beta)																	20 b2
0410	Dogger (without Kandern formation)															04_bjm_ges
0411	Dogger			06_jm															05 b	TLi-2019	lca_bw_bjm	08 l	10 l		base_dogger_OE
0412	Dogger + Posidonienschiefer	6-ATPO_tvd_on_offshore_merge_DGM50_ED50_UTM31
0413	Lias (without Posidonienschiefer)	7-AT_tvd_on_offshore_merge_DGM50_ED50_UTM31
0414	Lias			07_ju					InfluinsModellBasis_ju							05_bju_ges			06 l	TKeu-2019	lca_bw_bju		11 tr
0415	Dogger (below top Hauptrogenstein) + Lias														090_bju_all_cut_rco_s01
0416	Jurassic				05JU_b	gg_j_b																					10_Mesozoic_Triassic		Fig. 7,8,9 - Top Triassic			Profilschnitt 4
0417	Cenozoic + Lower Jurassic						s_geologie_MuKaKeuper
0501	Rhaet			08_ko					InfluinsModellBasis_ko
0502	Lias + Rhaet																					09a km
0503	Dogger (Alpha) + Lias + Rhaet																	21 b
0504	Middle Keuper								InfluinsModellBasis_kmGU													09b ku
0505	Upper and middle Keuper																				lca_bw_bkm
0506	Lower Keuper								InfluinsModellBasis_ku												lca_bw_bk	09c mo
0507	Middle and lower Keuper			09_ku
0508	Keuper														100_bku_all_cut_rco_s01	06_bk_ges			07 k	TMus-2019									Fig. 6,7,8,9 - Top Muschelkalk			Profilschnitt 4
0509	Quarternary to Keuper																Muka_Ok
0510	Ceratitenschichten								InfluinsModellBasis_moC
0511	Trochitenkalk								InfluinsModellBasis_moT
0512	Upper Muschelkalk																					09d mm
0513	Upper Muschelkalk + Diemel formation														110_tms_all_cut_rco_s01						lca_bw_bmmD
0514	Middle Muschelkalk								InfluinsModellBasis_mm
0515	Lower Muschelkalk								InfluinsModellBasis_mu
0516	Middle Muschelkalk (below Diemel formation) + Lower Muschelkalk														120_bmu_all_cut_rco_s01						lca_bw_btr
0517	Muschelkalk															07_bm_ges	Bunts_Ok												Fig. 6,7,8,9 - Top Buntsandstein			Profilschnitt 4
0518	Middle and lower Keuper + Muschelkalk																	22 tr2
0519	Keuper + Muschelkalk						s_geologie_Buntsandstein
0520	Roet								InfluinsModellBasis_so
0521	Muschelkalk + Roet			10_so
0522	Keuper + Muschelkalk + Roet	8-RN_tvd_on_offshore_merge_DGM50_ED50_UTM31
0523	Middle Buntsandstein			11_sm					InfluinsModellBasis_sm
0524	Lower Buntsandstein			12_su					InfluinsModellBasis_su
0525	Middle and lower Buntsandstein	9-RB_tvd_on_offshore_merge_DGM50_ED50_UTM31
0526	Buntsandstein						s_geologie_Zechstein								130_btr_all_cut_rco_s01	08_bs_ges	Trias_Uk												Fig. 6,7,8,9 - Top Buntsandstein			Profilschnitt 4
0527	Muschelkalk + Buntsandstein																			BMes-2019
0528	Triassic					gg_tr_b																					11_Zechstein_Salt
0601	Zechstein (saline)	10-ZE_tvd_on_offshore_merge_DGM50_ED50_UTM31		13_z		gg_z_b	s_geologie_Rotliegend		InfluinsModellBasis_z1ANa_z2Ta																		12_Zechstein_Carbonates; 13_Permo-Carboniferous_Rotliegend_Sediments
0602	Zechstein (non-saline sediments)	10-ZE_tvd_on_offshore_merge_DGM50_ED50_UTM31				gg_z_b	s_geologie_Rotliegend									09_bz_ges											13_Permo-Carboniferous_Rotliegend_Sediments
0603	Upper Rotliegend	11-RO_tvd_on_offshore_merge_DGM50_ED50_UTM31
0604	Triassic + Zechstein + Upper Rotliegend				06TR_07PE_b
0605	Rotliegend (sediments)																										14_Permo-Carboniferous_Volcanics_of_Northern_Germany
0606	Rotligend (volcanic rocks)																										15_Pre-Permian_Sedimentary_Units_of_Northern_Germany
0607	Rotliegend (unclassified)					gg_r_b	s_geologie_PraePerm		InfluinsModellBasis_r_co							10_brco_ges		23 p		BPC-2019; BPC-assumed-2019	lca_bw_bco
0608	Zechstein (non-saline sediments) + Rotliegend																		08 pu										Fig. 6,7,8,9 - Top Paleozoic metasedimentary rocks and Varsican nappe (BSF1)			Abbildung 14
0701	Stefanium + Westfalium	12-DCC_tvd_onshore_DGM50_RD			08_01CA_We_b
0702	Namurium		top_dinant_final_tvd		08_02CA_Na_b
0703	Dinantium		base_dinantien_tvd_final		08_03CA_Di_b
0704	Carboniferous					gg_c_b
0801	Middle Devonian					gg_dm_b
0802	Devonian				09DE_b
0901	Variscan Napps							GiessenHarzNappe_RHZ_WeinertEtAl_20201208																					Fig. 6,7,8,9 - Base Paleozoic metasedimentary rocks and Varsican nappe (BSF1)			Abbildung 14
1001	Dogger + Lias																							09 KGr
1002	Triassic																						12 KGr
1003	Middle and lower Muschelkalk + Rotliegend																					10 KGr
1004	Zechstein + Rotliegend + Pennsylvanian														170_tkr_all_cut_rco_s01
1101	Thrusted units of the Alps																										08_Mesozoic_Cretaceous						Map 22.1	Fig. 20
1102	Sediments outside area with high stratigraphic resolution																									1-s2.0-S0040195113002679-mmc2		Fig. 7a					Map 22.1	Fig. 20														Profil 1-10,12-13, A+C	Fig. 11-18
1103	PrePerm Laurussia																									1-s2.0-S0040195113002679-mmc2	16_UC_Crystalline_Units_of_the_Alps	Fig. 7a							Fig. 6d	Fig. 4. PQ2	Fig. 6-18	Reinhold (2005), Fig. 19	Fig. 2a,3a,3b,3c	Fig. 6	Fig. 2	Fig. 5,6,7,8
1104	PrePerm Northern Phyllite Zone																									1-s2.0-S0040195113002679-mmc2	16_UC_Crystalline_Units_of_the_Alps	Fig. 7a							Fig. 6d	Fig. 4. PQ2	Fig. 6-18	Reinhold (2005), Fig. 19	Fig. 2a,3a,3b,3c	Fig. 6	Fig. 2	Fig. 5,6,7,8
1105	PrePerm Mid German Crystalline High																										16_UC_Crystalline_Units_of_the_Alps	Fig. 7a									Fig. 6-18					Fig. 6,7					Fig. 6	Profil 1-10,12-13, A+C	Fig. 11-18
1106	PrePerm Saxothuringian												ts_05_ELZ_02_001_Doehlener_Becken; ts_05_ELZ_09_001_Elbtal-Schiefergebirge; ts_05_ELZ_11_001_Lausitzer_Granodiorit	01_Meissen; 05_Type_Schellerhau_High_F_Low_P2O5; Gneiss_Freiberg_Lauenstein; Gneiss_UHP_Transitional; Mica_Schist_Eclogite; Saxon_Granulite_Massif														Fig. 7a									Fig. 6-18					Fig. 5,6,7,8	Fig. 4-11	Fig. 2b	Fig. 7	Fig. 5a	Fig. 6	Profil 10,12
1107	PrePerm Moldanubian												ts_05_ELZ_02_001_Doehlener_Becken; ts_05_ELZ_09_001_Elbtal-Schiefergebirge; ts_05_ELZ_11_001_Lausitzer_Granodiorit	01_Meissen; 05_Type_Schellerhau_High_F_Low_P2O5; Gneiss_Freiberg_Lauenstein; Gneiss_UHP_Transitional; Mica_Schist_Eclogite; Saxon_Granulite_Massif			Grundg_Ok										16_UC_Crystalline_Units_of_the_Alps	Fig. 7a				Abbildung 14	Map 22.1	Fig. 20
1108	PrePerm ALCAPA																											Fig. 7a
1201	Upper Crust Tauern Window																										17_UC_Bohemian_Granite
1202	Upper Crust Bohemian Granites																										18_UC_Alpine_Domain
1203	Upper Crust ALCAPA																										24_LC_Central_and_Western_Germany	Fig. 7b
1204	Upper Crust Moldanubian																										24_LC_Central_and_Western_Germany	Fig. 7b
1205	Upper Crust Saxothuringian																									1-s2.0-S0040195113002679-mmc11	24_LC_Central_and_Western_Germany	Fig. 7b
1206	Upper Crust Mid German Crystalline High																									1-s2.0-S0040195113002679-mmc11	24_LC_Central_and_Western_Germany	Fig. 7b
1207	Upper Crust Avalonia																									1-s2.0-S0040195113002679-mmc11	24_LC_Central_and_Western_Germany	Fig. 7b
1208	Upper Crust Baltica																									1-s2.0-S0040195113002679-mmc11	23_UC_Baltica, 24_LC_Central_and_Western_Germany	Fig. 7b
1301	Lower Crust Central and Western Germany																										25_LC_Central_and_Eastern_Germany
1302	Lower Crust Central and Eastern Germany																										26_LC_South-Western_Germany
1303	Lower Crust South-Western Germany																										27_LC_Alps
1304	Lower Crust Alps																										28_LC_South-Eastern_Germany
1305	Lower Crust South-Eastern Germany																										29_LC_Central_and_Northern_Germany
1306	Lower Crust Central and Northern Germany																										30_Lithospheric_Mantle
1307	Lower Crust outside 3DD area																									p_CEBS_Middle_upper_Baltica_thickness_depth_ohne3DD
[truncated: 5 more columns]

## Sheet: References
Anikiev, D., Lechel, A., Gomez Dacal, M. L., Bott, J., Cacace, M., and Scheck-Wenderoth, M.: A three-dimensional lithospheric-scale thermal model of Germany, Adv. Geosci., 49, 225–234, https://doi.org/10.5194/adgeo-49-225-2019, 2019.
Bachmann, G. H., Bayer, U., Duerbaum, H. J., Hoffmann, N., Krawczyk, C. M., Lueck, E., McCann, T., Meissner, R., Meyer, H., Oncken, O., Polom, U., Prochnow, U., Rabbel, W., Scheck, M., and Stiller, M.: Deep crustal structure of the Northeast German Basin; new DEKORP-BASIN ’96 deep-profiling results, Geology, 27, 55‐58, https://doi.org/10.1130/0091-7613(1999)027<0055:DCSOTN>2.3.CO;2, 1999.
Bär, K., Schäffer, R., Weinert, S., and Sass, I.: Verbundprojekt „Hessen 3D 2.0“ 3D-Modell der geothermischen Tiefenpotenziale von Hessen - Petrothermale Potenziale und Mitteltiefe Potenziale zur Wärmenutzung und Wärmespeicherung (Teilvorhaben A): Schlussbericht zum BMWi-geförderten Verbundprojekt „Hessen 3D 2.0“ (FKZ 0325944A), 194 pp., https://doi.org/10.2314/KXP:1795616571, 2021.
Behr, H. J., Duerbaum, H. J., Bankwitz, P., Bankwitz, E., Benek, R., Berger, H. J., Brause, H., Conrad, W., Foerste, K., Frischbutter, A., Gebrande, H., Giese, P., Goethe, W., Guertler, J., Haenig, D., Haupt, M., Heinrichs, T., Horst, W., Hurtig, E., and Kaempf, H.: Crustal structure of the Saxothuringian Zone; results of the deep seismic profile MVE-90(East), Z. Geol. Wissenschaft., 22, 647–770,…
BGR, LAGB, LBEG, LBGR, LLUR, and LUNG: 3D-Modell des geologischen Untergrundes des Norddeutschen Beckens (Projekt TUNB): Erstveröffentlichung 2021, Version 2022, https://gst.bgr.de (last access: 13 January 2026), 2022.
Blundell, D., Freeman, R., and Mueller, S. (Eds.): A continent revealed: The European geotraverse, Cambridge Univ. Pr, Cambridge, 275 pp., ISBN 978-0521429481, 1992.
Cazes, M., Torreilles, G., Bois, C., Damotte, B., Galdeano, A., Hirn, A., Mascle, A., Matte, P., van Ngoc, P., and Raoult, J. F.: Structure de la croute hercynienne du Nord de la France; premiers resultats du profil ECORS, B. Soc. Geol. Fr., 8, 925–941, https://doi.org/10.2113/gssgfbull.I.6.925, 1985.
Deckers, J., de Koninck, R., Bos, S., Broothaers, M., Dirix K., Hambsch L., Lagrou, D., Lanckacker, T., Matthijs, J., Rombaut, B., van Baelen, K., and van Haren, T.: Geologisch (G3Dv3) en hydrogeologisch (H3D) 3D-lagenmodel van Vlaanderen, https://www.dov.vlaanderen.be/page/geologisch-3d-model-g3dv3 (last access: 13 January 2026), 2019.
DEKORP Research Group: Results of deep reflection seismic profiling in the Oberpfalz (Bavaria), Geophys. J. Int., 89, 353–360, https://doi.org/10.1111/j.1365-246X.1987.tb04430.x, 1987.
Donner, E.: Geologisches 3D Modell Niederbayern. Status: Schematisches Volumenmodell, LfU, https://www.3dportal.lfu.bayern.de/ (last access: 13 January 2026), 2020b.
Enderle, U., Schuster, K., Prodehl, C., Schulze, A., and Bribach, J.: The refraction seismic experiment GRANU95 in the Saxothuringian belt, southeastern Germany, Geophys. J. Int., 133, 245–259, https://doi.org/10.1046/j.1365-246X.1998.00462.x, 1998.
Fazlikhani, H., Bauer, W., and Stollhofen, H.: Variscan structures and their control on latest to post-Variscan basin architecture: insights from the westernmost Bohemian Massif and southeastern Germany, Solid Earth, 13, 393–416, https://doi.org/10.5194/se-13-393-2022, 2022.
GEBCO Bathymetric Compilation Group 2022: The GEBCOGrid - a continuous terrain model of the global oceans and land, NERC EDS British Oceanographic Data Centre NOC [data set], https://doi.org/10.5285/e0f0bb80-ab44-2739-e053-6c86abc0289c, 2022.
Geologischer Dienst NRW: Geowissenschaftliche Daten: Landesmodell NRW (2022), © Geologischer Dienst NRW, https://www.gd.nrw.de/ge_eb_3d_modelle.htm (last access: 13 January 2026), 2022.
GeoMol LCA-Projectteam: GeoMol pilot area Lake Constance - Allgäu (Baden-Wuerttemberg), LGRB Kartenserver, http://maps.geomol.eu/ (last access: 13 January 2026), 2015a.
GeoMol LCA-Projectteam: GeoMol pilot area Lake Constance - Allgäu (Bavaria), LfU, https://www.3dportal.lfu.bayern.de/ (last access: 13 January 2026), 2015b.
GeoMol Team: GeoMol framework model (Bavaria), LfU, https://www.3dportal.lfu.bayern.de/ (last access: 13 January 2026), 2015b.
GeoMol UA-UB-Projectteam: GeoMol pilot area Upper Austria – Upper Bavaria (Bavaria), LfU, https://www.3dportal.lfu.bayern.de/ (last access: 13 January 2026), 2015.
GeORG-Projektteam: Geopotentiale des tieferen Untergrundes im Oberrheingraben: Fachlich-Technischer Abschlussbericht des INTERREG-Projekts GeORG, Teil 4, Freiburg i. Br., 104 pp., http://www.geopotenziale.eu/products/atlas/pdf/atlas_web.pdf (last access: 13 January 2026), 2013.
Görne, S.: Geologisches 3D Modell der Elbtalzone, LfULG, http://lsnq.de/3delbezone (last access: 13 January 2026), 2012a.
Görne, S.: Geologisches 3D Modell des "Zwischengebietes", LfULG, http://lsnq.de/3dzwischen (last access: 13 January 2026), 2012b.
Görne, S.: Geologisches 3D Modell NW-Sachsen, LfULG, http://lsnq.de/3dnwsachsen (last access: 13 January 2026), 2011.
Görne, S. and Geißler, V.: Geologisches 3D Modell der Niederlausitz, LfULG, http://lsnq.de/3dniedlau (last access: 13 January 2026), 2015.
Grad, M., Tiira, T., and ESC Working Group: The Moho depth map of the European Plate, Geophys. J. Int., 176, 279–292, https://doi.org/10.1111/j.1365-246X.2008.03919.x, 2009.
Guy, A., Edel, J.-B., Schulmann, K., Tomek, Č., and Lexa, O.: A geophysical model of the Variscan orogenic root (Bohemian Massif): Implications for modern collisional orogens, Lithos, 124, 144–157, https://doi.org/10.1016/j.lithos.2010.08.008, 2011.
Heinrichs, T., Giese, P., Bankwitz, P., Bankwitz, P., Bankwitz, E., and DEKORP Research Group: Dekorp 3/MVE-90(West) - preliminary geological interpretation of a deep near-vertical reflection profile between the Rhenish and the Bohemian Massifs, Germany, Z. Geol. Wissenschaft., 22, 771–801, 1994.
Hrubcová, P., Środa, P., Špičák, A., Guterch, A., Grad, M., Keller, G. R., Brueckl, E., and Thybo, H.: Crustal and uppermost mantle structure of the Bohemian Massif based on CELEBRATION 2000 data, J. Geophys. Res.-Sol. Ea., 110, https://doi.org/10.1029/2004JB003080, 2005.
Hurtig, E., Cermak, V., Haenel, R., and Zui, V.: Geothermal atlas of Europe, Haack, Gotha (Germany), 156 pp., ISBN 3-7301-0034-3, 1992.
Kirsch, M., Kroner, U., Hallas, P., and Stephan, T.: 3D Model of the Erzgebirge - Crustal-Scale 3D Modelling of the Allochthonous Domain of the Saxo-Thuringian Zone, LfULG, https://www.umwelt.sachsen.de/umwelt/infosysteme/gst3/?view=3bff4370-fd46-11ee-a8a8-3971a78cbd7e (last access: 13 January 2026), 2017.
Korsch, R. J. and Schäfer, A.: The Permo-Carboniferous Saar-Nahe Basin, south-west Germany and north-east France: basin formation and deformation in a strike-slip regime, Geol. Rundschau, 84, 293–318, https://doi.org/10.1007/BF00260442, 1995.
LfU: Bayerischer Geothermieatlas, STMWI, 135 pp., https://www.stmwi.bayern.de/energie/erneuerbare-energien/tiefengeothermie/ (last access: 13 January 2026), 2022.
Lindner, H., Scheibe, K., Seidel, K., and Hoffmann, N.: Berechnung von Relief, Tiefenlage und Magnetisierung des magnetisch wirksamen Kristallins für das Norddeutsche Becken, Z. Angew. Geol., 50, 65–74, 2004.
Maystrenko, Y. P. and Scheck-Wenderoth, M.: 3D lithosphere-scale density model of the Central European Basin System and adjacent areas, Tectonophysics, 601, 53–77, https://doi.org/10.1016/j.tecto.2013.04.023, 2013.
Meschede, M. and Warr, L. N.: The Geology of Germany, Springer, 304 pp., https://doi.org/10.1007/978-3-319-76102-2, 2019.
Oncken, O., Plesch, A., Weber, J., Ricken, W., and Schrader, S.: Passive margin detachment during arc-continent collision (Central European Variscides), in: Orogenic Processes: Quantification and Modelling in the Variscan Belt, edited by: Franke, W., Haak, V., Oncken, O., and Tanner, D., London, 199–216, https://doi.org/10.1144/GSL.SP.2000.179.01.13, 2000.
Pfleiderer, S., Götzl, G., Bottig, M., Brüstle, A. K., Porpaczy, C., Schreilechner, M., Eichkitz, C., Jud, M., Sachsenhofer, R., Zosseder, K., Casper, S., Goldbrunner, J., Kriegl, C., Kolmer, C., and Diepolder, G. W.: GeoMol - geologische 3D-Modellierung des österreichischen Molassebeckens und Anwendungen in der Hydrogeologie und Geothermie im Grenzgebiet von Oberösterreich und Bayern, Abhandlung…
Reichert, C.: DEKORP – Deutsches kontinentales reflexionsseismisches Programm – Vorgeschichte, Verlauf und Ergebnisse der bisherigen Arbeiten, in: Festschrift zum 60. Geburtstag von Hans-Jürgen Dürbaum, edited by: Beisser, M., Bosum, W., and Brüning, H., Schweizerbart Science Publishers, Stuttgart, Germany, 143–165, ISBN 978-3-510-96044-6, 1988.
Reinhold, K.: Tiefenlage der "Kristallin-Oberfläche" in Deutschland - Abschlussbericht, Hannover, 91 pp., https://www.bgr.bund.de/DE/Themen/Endlagerung/Downloads/Endlagerforschung/4_Kristallingestein/2005-05-31_Tiefenlage_Kristallinoberflaeche_2005.pdf?__blob=publicationFile&v=2 (last access: 13 January 2026), 2005.
Ringseis, H., Doppler, G., and Meyer, R. K.: Geologisches 3D-Modell Region Ingolstadt, LfU, https://www.3dportal.lfu.bayern.de/ (last access: 13 January 2026), 2020b.
Rupf, I. and Nitsch, E.: Das Geologische Landesmodell von Baden-Württtemberg: Datengrundlagen, technische Umsetzung und erste geologische Ergebnisse, Ladesamt für Geologie, Rohstoffe und Bergbau, Freiburg i. Br., LGRB-Informationen, 21, 81 pp., https://produkte.lgrb-bw.de/docPool/c623_data.pdf (last access: 13 January 2026), 2008.
Schintgen, T.: The Geothermal Potential of Luxembourg - Geological and thermal exploration for deep geothermal reservoirs in Luxembourg and the surroundings, Potsdam, 313 pp., http://nbn-resolving.de/urn:nbn:de:kobv:517-opus4-87110 (last access: 13 January 2026), 2015.
Sommaruga, A.: Décollement tectonics in the Jura forelandfold-and-thrust belt, Mar. Petrol. Geol., 16, 111–134, https://doi.org/10.1016/S0264-8172(98)00068-3, 1999.
Swisstopo: GeoMol - Geological Model, swisstopo, https://viewer.swissgeol.ch (last access: 8 September 2023), 2019.
Tašárová, Z. A., Fullea, J., Bielik, M., and Środa, P.: Lithospheric structure of Central Europe: Puzzle pieces from Pannonian Basin to Trans-European Suture Zone resolved by geophysical-petrological modeling, Tectonics, 35, 722–753, https://doi.org/10.1002/2015TC003935, 2016.
TLUBN: Geologisches 3D-Modell „Thüringer Becken“, NIBIS [data set], http://nibis.lbeg.de/cardoMap3/?th=1411 (last access: 13 January 2026), 2014.
TNO: Digital Geological Model (DGM) deep V5 on- and offshore, NLOG [data set], https://www.nlog.nl/en/dgm-deep-v5-and-offshore (last access: 13 January 2026), 2019a.
TNO: SCAN - 2D Seismic Interpretation and Depth Conversion for Dinantian, NLOG [data set], https://www.nlog.nl/en/scan-2d-seismic-interpretation-and-depth-conversion-dinantian (last access: 13 January 2026), 2019b.
Valasek, P. and Mueller, S.: A 3D tectonic model of the Central Alps based on an integrated interpretation of seismic refraction and NRP 20 reflection data, in: Deep structure of the Swiss alps: results of NRP 20, edited by: Pfiffner, O. A., Lehner, P., Heitzmann, P., Mueller, S., and Steck, A., Birkhauser Verlag, Basel, 302–325, ISBN 978-3-7643-5254-7, 1997.
Wagner, M., Kissling, E., and Husen, S.: Combining controlled-source seismology and local earthquake tomography to derive a 3-D crustal model of the western Alpine region, Geophys. J. Int., 191, 789–802, https://doi.org/10.1111/j.1365-246X.2012.05655.x, 2012.
Weinert, S., Bär, K., and Sass, I.: A geological 3D structural model of the Hessian Rhenohercynian basement, TUdatalib [data set], https://doi.org/10.48328/tudatalib-871, 2022.
Wenzel, F. and Brun, J. P.: A deep reflection seismic line across the Northern Rhine Graben, Earth Planet. Sc. Lett., 104, 140–150, https://doi.org/10.1016/0012-821X(91)90200-2, 1991.
