# Supplementary material for: A unified 3D geological model for Germany and adjacent areas
Source: Copernicus journal article supplement (doi:10.5194/essd-18-585-2026), 2026-01-22
Supplement: Supplementary file [file essd-18-585-2026-supplement-title-page.pdf › essd-18-585-2026-supplement-title-page.pdf]

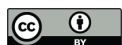

## *Supplement of*

# **A unified 3D geological model for Germany and adjacent areas**

**Steffen Ahlers and Andreas Henk**

*Correspondence to:* Steffen Ahlers (ahlers@geo.tu-darmstadt.de)

- [essd-18-585-2026-supplement-title-page.pdf](#)
- [Table S1 - Stratigraphic correlation.xlsx](#)
- [Table S2 - Model units.xlsx](#)
- [Table S3 - Overview of input models.pdf](#)

The copyright of individual parts of the supplement might differ from the article licence.
